# Supplementary material
Source: PubMed Central journal article supplement (PMC3357200)
Supplement: NIHMS369917-supplement-Target_Words.pdf [file NIHMS369917-supplement-Target_Words.pdf]

Lexical and phonological characteristics of target words; mean variability and mean proximity by word.

|               | <b>LogFreq</b> | <b>PND</b> | <b>AoA<br/>(mos.)</b> | <b>Pos Avg</b> | <b>Biph<br/>Avg</b> | <b>Cons<br/>AoA<br/>(yrs.)</b> | <b><i>M</i><br/>Variability<br/>(<i>SD</i>)</b> | <b><i>M</i><br/>Proximity<br/>(<i>SD</i>)</b> |
|---------------|----------------|------------|-----------------------|----------------|---------------------|--------------------------------|-------------------------------------------------|-----------------------------------------------|
| <i>Ball</i>   | 3.04           | 21         | 13.50                 | .0471          | .0022               | 3.75                           | 1.86<br>(.86)                                   | .61<br>(.06)                                  |
| <i>Boat</i>   | 2.86           | 27         | 18.00                 | .0555          | .0032               | 3.00                           | 1.50<br>(.84)                                   | .95<br>(.08)                                  |
| <i>Book</i>   | 3.29           | 17         | 15.52                 | .0383          | .0011               | 3.00                           | 1.42<br>(.51)                                   | .98<br>(.02)                                  |
| <i>Bus</i>    | 2.54           | 17         | 21.07                 | .0564          | .0037               | 3.00                           | 2.20<br>(.84)                                   | .95<br>(.03)                                  |
| <i>Car</i>    | 3.44           | 18         | 16.55                 | .0772          | .0164               | 3.75                           | 1.93<br>(1.16)                                  | .72<br>(.18)                                  |
| <i>Chair</i>  | 2.82           | 18         | 19.00                 | .0534          | .0043               | 4.25                           | 2.53<br>(1.30)                                  | .59<br>(.19)                                  |
| <i>Cheese</i> | 1.95           | 12         | 17.13                 | .0203          | .0011               | 4.50                           | 3.36<br>(1.08)                                  | .69<br>(.07)                                  |
| <i>Clock</i>  | 2.30           | 13         | 19.86                 | .0500          | .0035               | 3.50                           | 2.14<br>(.69)                                   | .78<br>(.16)                                  |
| <i>Cup</i>    | 2.65           | 15         | 18.29                 | .0563          | .0028               | 3.00                           | 2.11<br>(1.17)                                  | .90<br>(.08)                                  |
| <i>Dog</i>    | 2.88           | 8          | 13.91                 | .0288          | .0008               | 3.00                           | 3.00<br>(2.83)                                  | .56<br>(.06)                                  |
| <i>Duck</i>   | 1.95           | 22         | 16.18                 | .0482          | .0088               | 3.00                           | 2.00<br>(1.00)                                  | .91<br>(.07)                                  |
| <i>Fish</i>   | 2.54           | 9          | 18.00                 | .0502          | .0030               | 3.50                           | 2.79<br>(.80)                                   | .79<br>(.09)                                  |
| <i>Flag</i>   | 2.20           | 6          | 25.30                 | .0330          | .0049               | 3.75                           | 2.50<br>(1.38)                                  | .69<br>(.09)                                  |
| <i>Fork</i>   | 2.15           | 10         | 20.20                 | .0541          | .0089               | 4.00                           | 2.82<br>(1.33)                                  | .66<br>(.11)                                  |
| <i>Frog</i>   | 1.00           | 3          | 21.45                 | .0391          | .0025               | 4.50                           | 3.00<br>(1.13)                                  | .63<br>(.09)                                  |
| <i>Goose</i>  | 1.60           | 11         | 27.24                 | .0423          | .0009               | 3.00                           | 1.89<br>(.78)                                   | .94<br>(.06)                                  |
| <i>Green</i>  | 3.06           | 13         | 24.41                 | .0457          | .0057               | 4.50                           | 2.38<br>(1.19)                                  | .80<br>(.12)                                  |
| <i>Hat</i>    | 2.75           | 31         | 17.72                 | .0616          | .0056               | 3.00                           | 1.53<br>(.92)                                   | .94<br>(.08)                                  |
| <i>House</i>  | 3.77           | 6          | 21.73                 | .0426          | .0010               | 3.00                           | 1.60<br>(.89)                                   | .92<br>(.08)                                  |
| <i>Juice</i>  | 2.04           | 11         | 15.79                 | .0382          | .0014               | 3.50                           | 2.83<br>(1.83)                                  | .83<br>(.09)                                  |
| <i>Light</i>  | 3.52           | 26         | 19.13                 | .0448          | .0035               | 3.00                           | 1.67<br>(.58)                                   | .69<br>(.23)                                  |
| <i>Milk</i>   | 2.69           | 3          | 18.15                 | .0673          | .0063               | 3.33                           | 1.77<br>(.93)                                   | .70<br>(.08)                                  |
| <i>Mouse</i>  | 2.00           | 12         | 20.68                 | .0486          | .0008               | 3.00                           | 2.00<br>(.71)                                   | .96<br>(.03)                                  |
| <i>Phone</i>  | 2.73           | 23         | 19.47                 | .0640          | .0042               | 3.00                           | 2.00<br>(1.41)                                  | .84<br>(.23)                                  |
| <i>Pig</i>    | 1.90           | 18         | 18.94                 | .0662          | .0042               | 3.00                           | 2.00<br>(.87)                                   | .77<br>(.08)                                  |

|              |      |    |       |       |       |      |                |              |
|--------------|------|----|-------|-------|-------|------|----------------|--------------|
| <i>Sheep</i> | 2.36 | 19 | 22.73 | .0262 | .0012 | 3.25 | 2.31<br>(.95)  | .88<br>(.07) |
| <i>Slide</i> | 2.30 | 8  | 21.52 | .0498 | .0024 | 4.50 | 3.23<br>(1.48) | .62<br>(.14) |
| <i>Sock</i>  | 1.60 | 22 | 17.16 | .0721 | .0028 | 3.00 | 2.00<br>(.82)  | .92<br>(.09) |
| <i>Spoon</i> | 1.78 | 10 | 18.36 | .0461 | .0033 | 3.75 | 2.80<br>(1.26) | .72<br>(.20) |
| <i>Star</i>  | 2.40 | 7  | 23.21 | .0482 | .0071 | 5.00 | 2.64<br>(1.01) | .58<br>(.20) |
| <i>Train</i> | 2.91 | 12 | 19.80 | .0492 | .0065 | 4.50 | 2.83<br>(1.40) | .71<br>(.15) |
| <i>Truck</i> | 2.76 | 5  | 17.77 | .0502 | .0056 | 4.50 | 3.15<br>(1.14) | .74<br>(.13) |

---

*Note:* LogFreq = log word frequency; PND = phonological neighborhood density; AoA = word age-of-acquisition in months; Pos Avg = average positional segment frequency; Biph Avg = average biphone frequency; Cons AoA = average consonant age-of-acquisition in years.
