# Supplementary material
Source: PubMed Central journal article supplement (PMC3357200)
Supplement: NIHMS369917-supplement-Transcribed_Examples.pdf [file NIHMS369917-supplement-Transcribed_Examples.pdf]

Transcribed examples of variable and stable target words from each participant.

| Participant # | Target word   | Production # |       |        |        |        | # of forms |
|---------------|---------------|--------------|-------|--------|--------|--------|------------|
|               |               | #1           | #2    | #3     | #4     | #5     |            |
| 1             | <i>star</i>   | ʃa           | tʃʌ   | ʃʌʔ    | tʌ     | ʃʌ     | 3          |
|               | <i>sock</i>   | sak          | sak   | sak    | sak    | sak    | 1          |
| 2             | <i>frog</i>   | bwak         | wak   | fwat   | fwa    | fwak   | 5          |
|               | <i>milk</i>   | mauk         | meuk  | mauk   | mauk   | meuk   | 1          |
| 3             | <i>ball</i>   | bʌd          | bε    | vaʔ    | bʌ     | pəl    | 4          |
|               | <i>bus</i>    | bus          | bas   | bas    | bʌs    | bas    | 1          |
| 4             | <i>train</i>  | tʃem         | drem  | tem    | swem   | twem   | 5          |
|               | <i>sun</i>    | sʌn          | sʌn   | sən    | sʌn    | sʌn    | 1          |
| 5             | <i>juice</i>  | dus          | dʊst  | dʒʊs   | duʃ    | dʒʊʃ   | 5          |
|               | <i>boat</i>   | bʊt          | bot   | bot    | bot    | bʊt    | 1          |
| 6             | <i>slide</i>  | stjart       | slart | sarθ   | sart   | tsarçt | 5          |
|               | <i>truck</i>  | twʌk         | twʌk  | twʌk   | twʌk   | twʌk   | 1          |
| 7             | <i>slide</i>  | pəlaɪ        | slaɪ  | tslart | tslaɪd | laɪd   | 5          |
|               | <i>car</i>    | kar          | kar   | kar    | kar    | kar    | 1          |
| 8             | <i>fish</i>   | wɪs          | wɪs   | dɪs    | wɪs    | bɪs    | 3          |
|               | <i>duck</i>   | gʌk          | gʌk   | gʌk    | gʌk    | gʌk    | 1          |
| 9             | <i>flag</i>   | fleɪk        | fɛk   | feɪx   | feɪg   | feɪh   | 5          |
|               | <i>cup</i>    | kʌp          | kʌp   | kʌp    | kʌp    | kʌp    | 1          |
| 10            | <i>green</i>  | gwin         | grɪn  | gwin   | gwi    | ɡɪn    | 4          |
|               | <i>book</i>   | bʊk          | bʊk   | bʊk    | bʊk    | bʊk    | 1          |
| 11            | <i>cheese</i> | tɪz          | tiθ   | tɪs    | tɪf    | tiθ    | 4          |
|               | <i>sheep</i>  | sɪp          | sɪp   | sɪp    | sɪp    | sɪp    | 1          |
| 12            | <i>truck</i>  | ʃʌk          | tʃwɪk | sʌk    | ʃʊk    | twʌk   | 5          |
|               | <i>ball</i>   | bou          | bou   | bou    | bɔ     | bou    | 1          |
| 13            | <i>juice</i>  | dɪjuʃ        | dɪʒʊs | dʒʊʃ   | djuʃ   | dʒʊs   | 5          |
|               | <i>pig</i>    | pɪk          | pɪk   | pɪk    | pɛk    | pɪk    | 1          |
| 14            | <i>star</i>   | səə          | səə   | swʌ    | tsəə   | sar    | 4          |
|               | <i>fish</i>   | fɪs          | fɛs   | fɪs    | fɪs    | fɪs    | 1          |
| 15            | <i>spoon</i>  | pun          | pu    | mu     | pun    | bʊ     | 4          |
|               | <i>hat</i>    | hæʔ          | hæʔ   | hæʔ    | hæʔ    | hæʔ    | 1          |
